# Supplementary material
Source: Research Square preprint supplement (doi:10.21203/rs.3.rs-10211523/v1)
Supplement: Supplementary file 1 [file 88abaf0331e90c487581848d.docx]

**Online resources for “Multi-objective Optimization in Sports Equipment Design Using Expected Hypervolume Improvement: A Race Car Rear Wing and a Discus”**

**Kazuya Seo, Yuki Fujinami, Ryoto Nakamura and Kotaro Ishikawa**

Online Resource - Supplementary Information (SI) –

**S1 Test problem to confirm EHVI**

As a benchmark to evaluate the effectiveness of EHVI, the welded-beam design problem [1] was employed. This problem considers a beam of height *T* and thickness *B* welded to a rigid support through a weld of length *L* and height *H*, while a concentrated load *F* is applied at the free end. The objective is to determine the design variables to minimize both the beam-tip displacement and the fabrication cost. These two objectives are inherently conflicting, since improving structural stiffness typically requires additional material, thereby increasing the manufacturing cost.

The tip displacement is defined by

|  | (1) |
| --- | --- |

where *E* is Young's modulus and *S* denotes the beam length. The manufacturing cost is given by

|  | (2) |
| --- | --- |

where *Wvol* and *Mvol* are the weld and beam volumes, and *Wc* and *Mc* are their respective unit costs.

The design variables are *H*, *L*, *T*, and *B*, subject to the following ranges:

| 1 ≤ *H* ≤ 15,  3 ≤ *L* ≤ 50,  10 ≤ *T* ≤ 50,  1 ≤ *B* ≤ 15 | (3)  (4)  (5)  (6) |
| --- | --- |

In addition, the following constraints are imposed:

|  | (7) |
| --- | --- |
|  | (8) |
|  | (9) |

where the maximum shear stress (Max*S*) and maximum normal stress (Max*T*) are defined as

|  | (10) |
| --- | --- |
|  | (11) |

with

|  | (12) |
| --- | --- |
|  | (13) |
|  | (14) |

This problem is widely used as a benchmark for constrained multi-objective optimization because it exhibits a clear trade-off between structural compliance and cost while involving both geometric and stress-related feasibility conditions.

**S1.1 Initial samples**

In the first phase (Steps 1 and 2 in Figure 1), the initial set of design variables, **𝑥**, was generated using Latin hypercube sampling (LHS). A total of 20 initial design points were prepared and labeled from LHS1 to LHS20, as listed in Table S1.1. Based on previous experience, *5d* initial samples are typically used, where *d* denotes the number of design variables. Because the present test problem has four design variables, the number of initial samples was set to 20. Although the cost is expressed in Japanese yen, the specific currency unit is not important for the present analysis.

| **Table S1.1** The initial set of design variables, ***x***, was generated using Latin hypercube sampling (LHS). A total of 20 initial design points were prepared and labeled from LHS1 to LHS20. | | | | | | |
| --- | --- | --- | --- | --- | --- | --- |
| No | *H* [mm] | *L* [mm] | *T* [mm] | *B* [mm] | *F1* [mm] | *F2* [Yen] |
| LHS1 | 9.19 | 45.46 | 28.64 | 14.67 | 0.000544 | 4448.6 |
| LHS2 | 3.16 | 31.84 | 48.75 | 7.91 | 0.000205 | 825.5 |
| LHS3 | 2.12 | 36.83 | 43.57 | 12.15 | 0.000187 | 890.6 |
| LHS4 | 7.33 | 6.83 | 40.33 | 12.85 | 0.000222 | 921.1 |
| LHS5 | 5.60 | 41.95 | 37.53 | 8.08 | 0.000439 | 1744.0 |
| LHS6 | 8.31 | 25.09 | 34.04 | 11.74 | 0.000405 | 2231.8 |
| LHS7 | 9.89 | 31.08 | 14.90 | 10.65 | 0.005326 | 3251.2 |
| LHS8 | 5.52 | 15.40 | 21.58 | 13.74 | 0.001358 | 811.2 |
| LHS9 | 5.92 | 38.54 | 49.68 | 13.09 | 0.000117 | 2253.3 |
| LHS10 | 4.65 | 27.12 | 39.65 | 10.42 | 0.000289 | 1112.3 |
| LHS11 | 1.49 | 28.17 | 47.77 | 4.27 | 0.000403 | 323.7 |
| LHS12 | 11.06 | 33.52 | 45.64 | 12.36 | 0.000160 | 4854.5 |
| LHS13 | 9.65 | 16.47 | 33.79 | 13.31 | 0.000365 | 2056.6 |
| LHS14 | 6.35 | 23.95 | 44.66 | 14.59 | 0.000144 | 1774.1 |
| LHS15 | 1.80 | 47.09 | 15.20 | 11.17 | 0.004780 | 402.3 |
| LHS16 | 2.80 | 22.67 | 17.42 | 3.63 | 0.009771 | 255.2 |
| LHS17 | 7.23 | 12.96 | 22.93 | 8.88 | 0.001752 | 907.5 |
| LHS18 | 4.33 | 34.32 | 23.71 | 4.67 | 0.003009 | 792.1 |
| LHS19 | 8.41 | 44.79 | 20.12 | 13.99 | 0.001644 | 3578.9 |
| LHS20 | 5.08 | 21.57 | 19.50 | 7.50 | 0.003371 | 734.9 |

**S1.2 Added samples derived by EHVI**

In Step 15 of Figure 1, one new promising design point, **𝑥***, was sequentially identified by EHVI in each loop based on the sampled data. A total of 20 added design points by EHVI were labeled from EHVI1 to EHVI20, as listed in Table S1.2.

| | **Table S1.2** Added design points, ***x****, derived by EHVI. A total of 30 additional design points were generated and labeled from EHVI1 to EHVI20. | | | | | | | | --- | --- | --- | --- | --- | --- | --- | | No | *H* [mm] | *L* [mm] | *T* [mm] | *B* [mm] | *F1* [mm] | *F2* [Yen] | | EHVI1 | 2.39 | 27.93 | 36.17 | 4.85 | 0.000817 | 384.0 | | EHVI2 | 1.53 | 28.41 | 34.66 | 4.90 | 0.000919 | 284.4 | | EHVI3 | 1.31 | 33.56 | 31.32 | 6.56 | 0.000931 | 331.6 | | EHVI4 | 1.00 | 33.06 | 35.01 | 5.97 | 0.000732 | 311.2 | | EHVI5 | 1.05 | 30.88 | 46.98 | 4.96 | 0.000364 | 339.4 | | EHVI6 | 1.78 | 27.38 | 32.23 | 4.47 | 0.001251 | 270.5 | | EHVI7 | 2.91 | 26.67 | 32.11 | 8.73 | 0.000649 | 580.6 | | EHVI8 | 1.00 | 36.49 | 37.81 | 5.05 | 0.000687 | 297.3 | | EHVI9 | 1.34 | 33.97 | 45.47 | 8.20 | 0.000243 | 560.7 | | EHVI10 | 1.12 | 29.80 | 48.70 | 4.50 | 0.000361 | 321.9 | | EHVI11 | 2.61 | 32.61 | 32.28 | 10.01 | 0.000556 | 651.4 | | EHVI12 | 2.16 | 24.18 | 47.96 | 3.50 | 0.000485 | 321.3 | | EHVI13 | 2.11 | 32.58 | 47.18 | 8.75 | 0.000204 | 691.7 | | EHVI14 | 1.38 | 29.12 | 48.15 | 9.99 | 0.000168 | 676.6 | | EHVI15 | 1.44 | 30.56 | 46.01 | 3.77 | 0.000511 | 290.0 | | EHVI16 | 1.05 | 27.57 | 50.00 | 5.25 | 0.000286 | 365.6 | | EHVI17 | 1.42 | 29.64 | 28.79 | 5.299336 | 0.001483 | 257.5 | | EHVI18 | 1.92 | 30.43 | 48.95 | 9.413413 | 0.00017 | 713.4 | | EHVI19 | 1.02 | 30.55 | 50.00 | 5.928843 | 0.000253 | 418.9 | | EHVI20 | 1.93 | 33.64 | 48.72 | 9.100937 | 0.000178 | 717.2 | |  |  |  |  |  |  |  | |
| --- | --- | --- | --- | --- | --- | --- | --- | --- | --- | --- | --- | --- | --- | --- | --- | --- | --- | --- | --- | --- | --- | --- | --- | --- | --- | --- | --- | --- | --- | --- | --- | --- | --- | --- | --- | --- | --- | --- | --- | --- | --- | --- | --- | --- | --- | --- | --- | --- | --- | --- | --- | --- | --- | --- | --- | --- | --- | --- | --- | --- | --- | --- | --- | --- | --- | --- | --- | --- | --- | --- | --- | --- | --- | --- | --- | --- | --- | --- | --- | --- | --- | --- | --- | --- | --- | --- | --- | --- | --- | --- | --- | --- | --- | --- | --- | --- | --- | --- | --- | --- | --- | --- | --- | --- | --- | --- | --- | --- | --- | --- | --- | --- | --- | --- | --- | --- | --- | --- | --- | --- | --- | --- | --- | --- | --- | --- | --- | --- | --- | --- | --- | --- | --- | --- | --- | --- | --- | --- | --- | --- | --- | --- | --- | --- | --- | --- | --- | --- | --- | --- | --- | --- | --- | --- | --- | --- | --- | --- | --- | --- | --- |
